# Supplementary material for: Pan-Cancer Analysis Reveals SH3TC2 as an Oncogene for Colorectal Cancer and Promotes Tumorigenesis via the MAPK Pathway
Source: MDPI journal article supplement (doi:10.3390/cancers14153735), 2022-07-31
Supplement: s1 [file s1]

# Pan-Cancer Analysis Reveals SH3TC2 as an Oncogene for Colorectal Cancer and Promotes Tumorigenesis via the MAPK Pathway

Chengzhi Huang, Hui Yi, Yue Zhou, Qing Zhang and Xueqing Yao

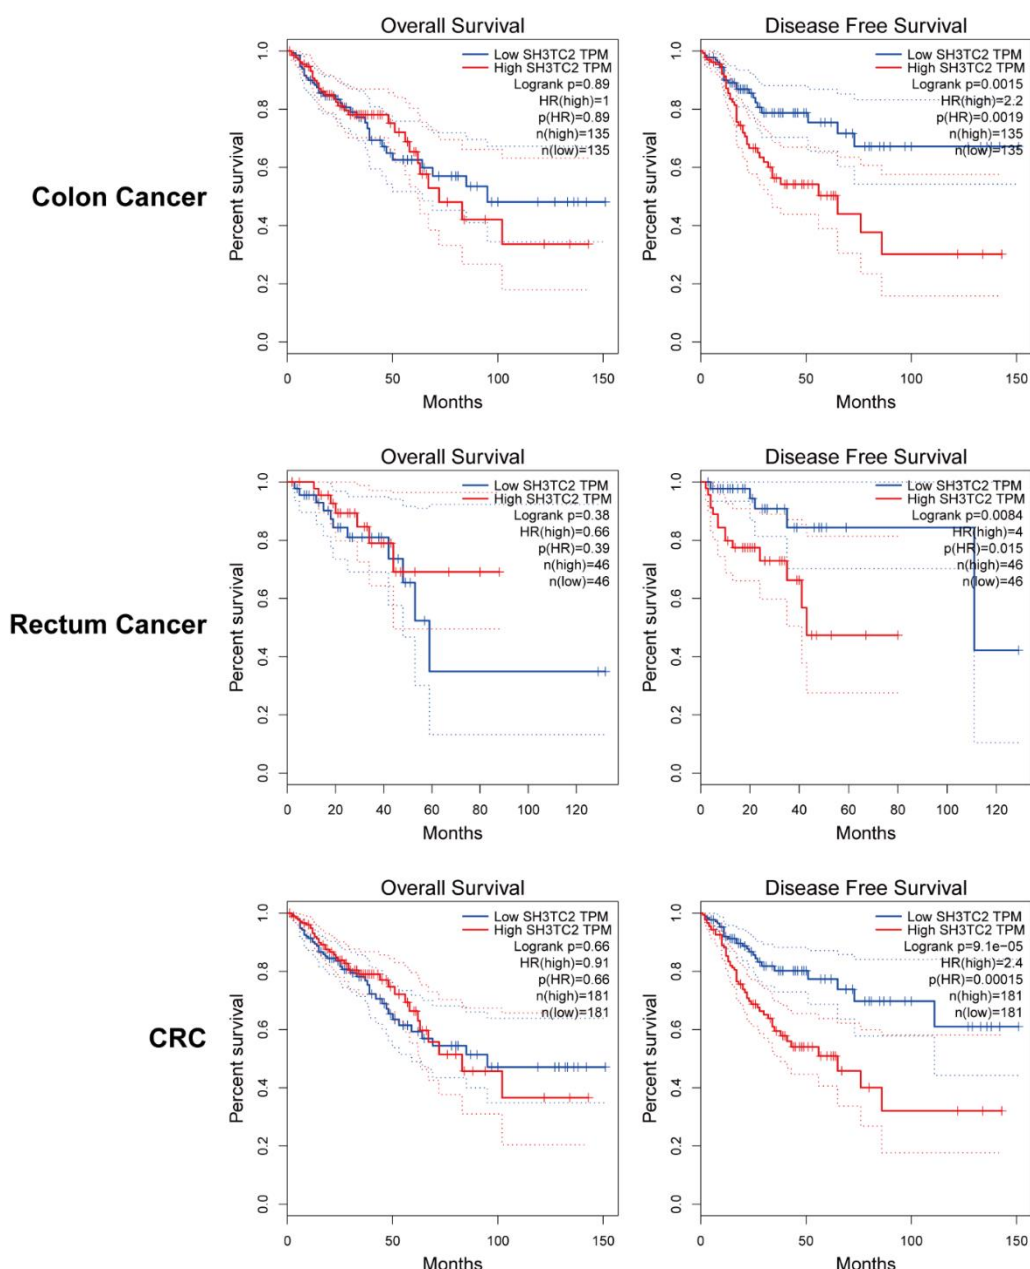

**Figure S1.** The bioinformatic analysis of prognostic value of SH3TC2 in CRC. The bioinformatic analysis via GEPIA database indicated that the higher expression of SH3TC2 in tumor tissue implied poor DFS of CRC patients (including colon cancer or rectum cancer patients), while no statistical significance was found in OS. The DFS plot of CRC was taken from Figure 1D.

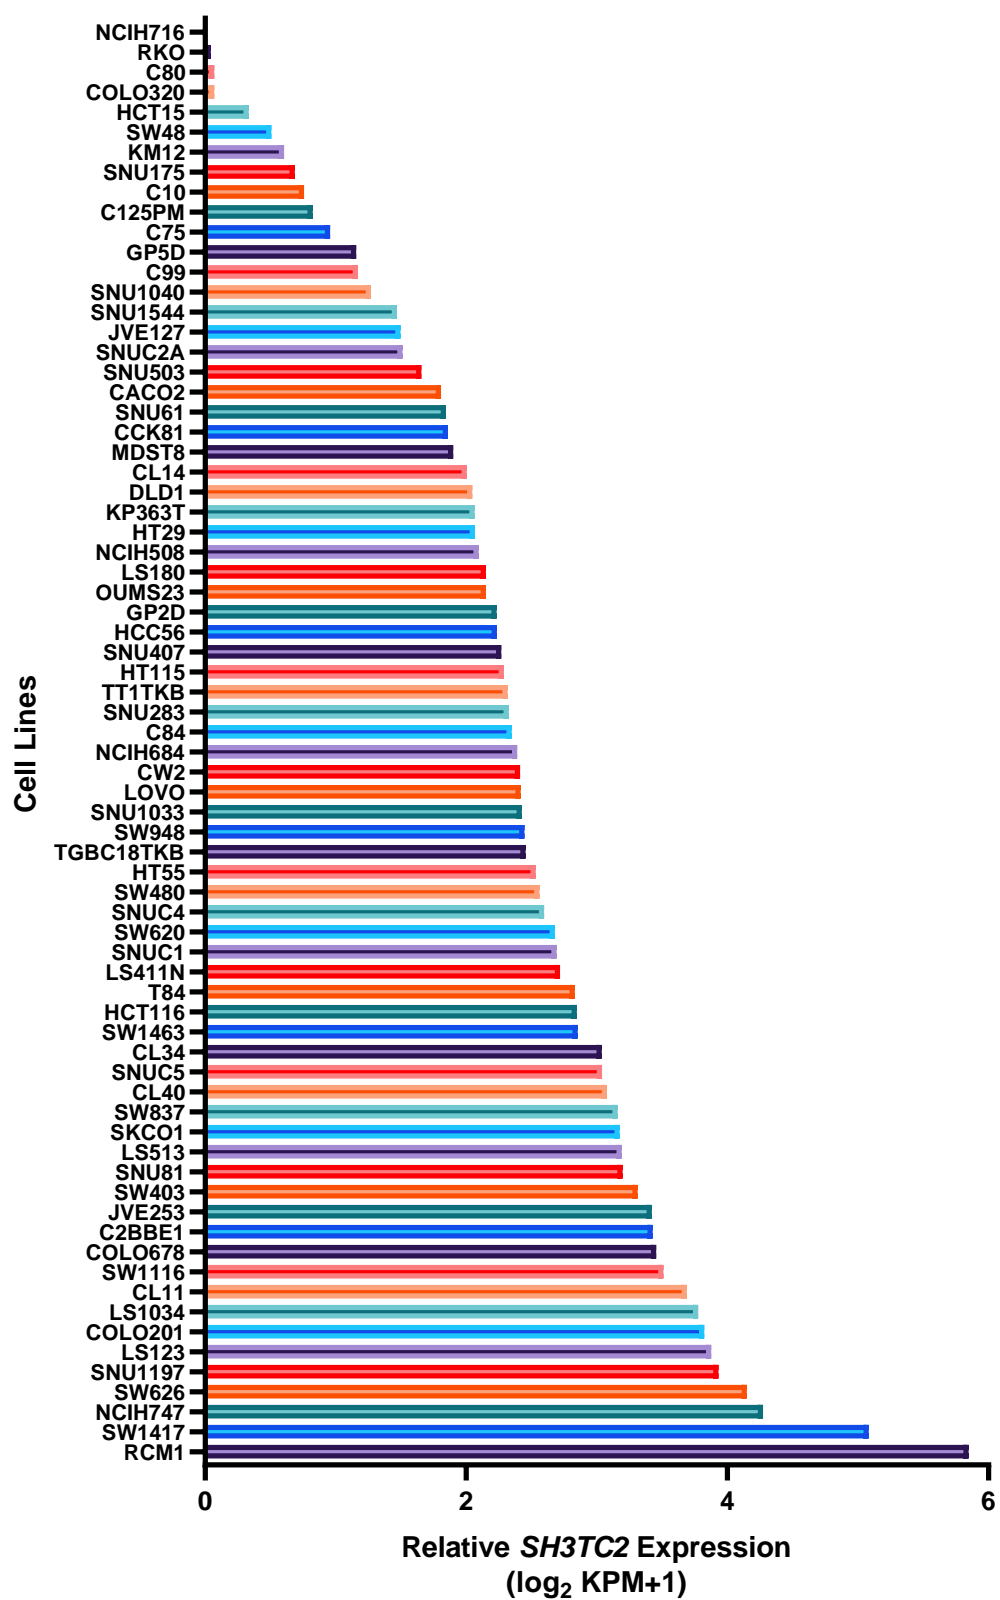

**Figure S2.** The bioinformatic analysis of relative expression of *SH3TC2* in CRC cell lines via CCLE database.

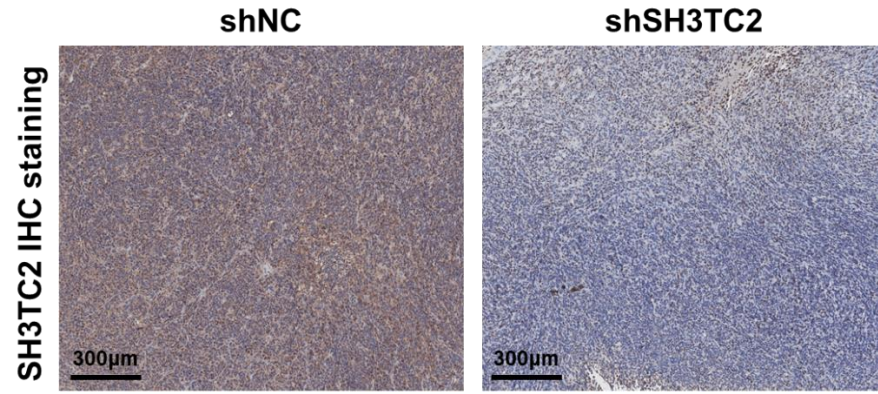

**Figure S3.** The knockdown efficacy of SH3TC2 in shSH3TC2 group in vivo.

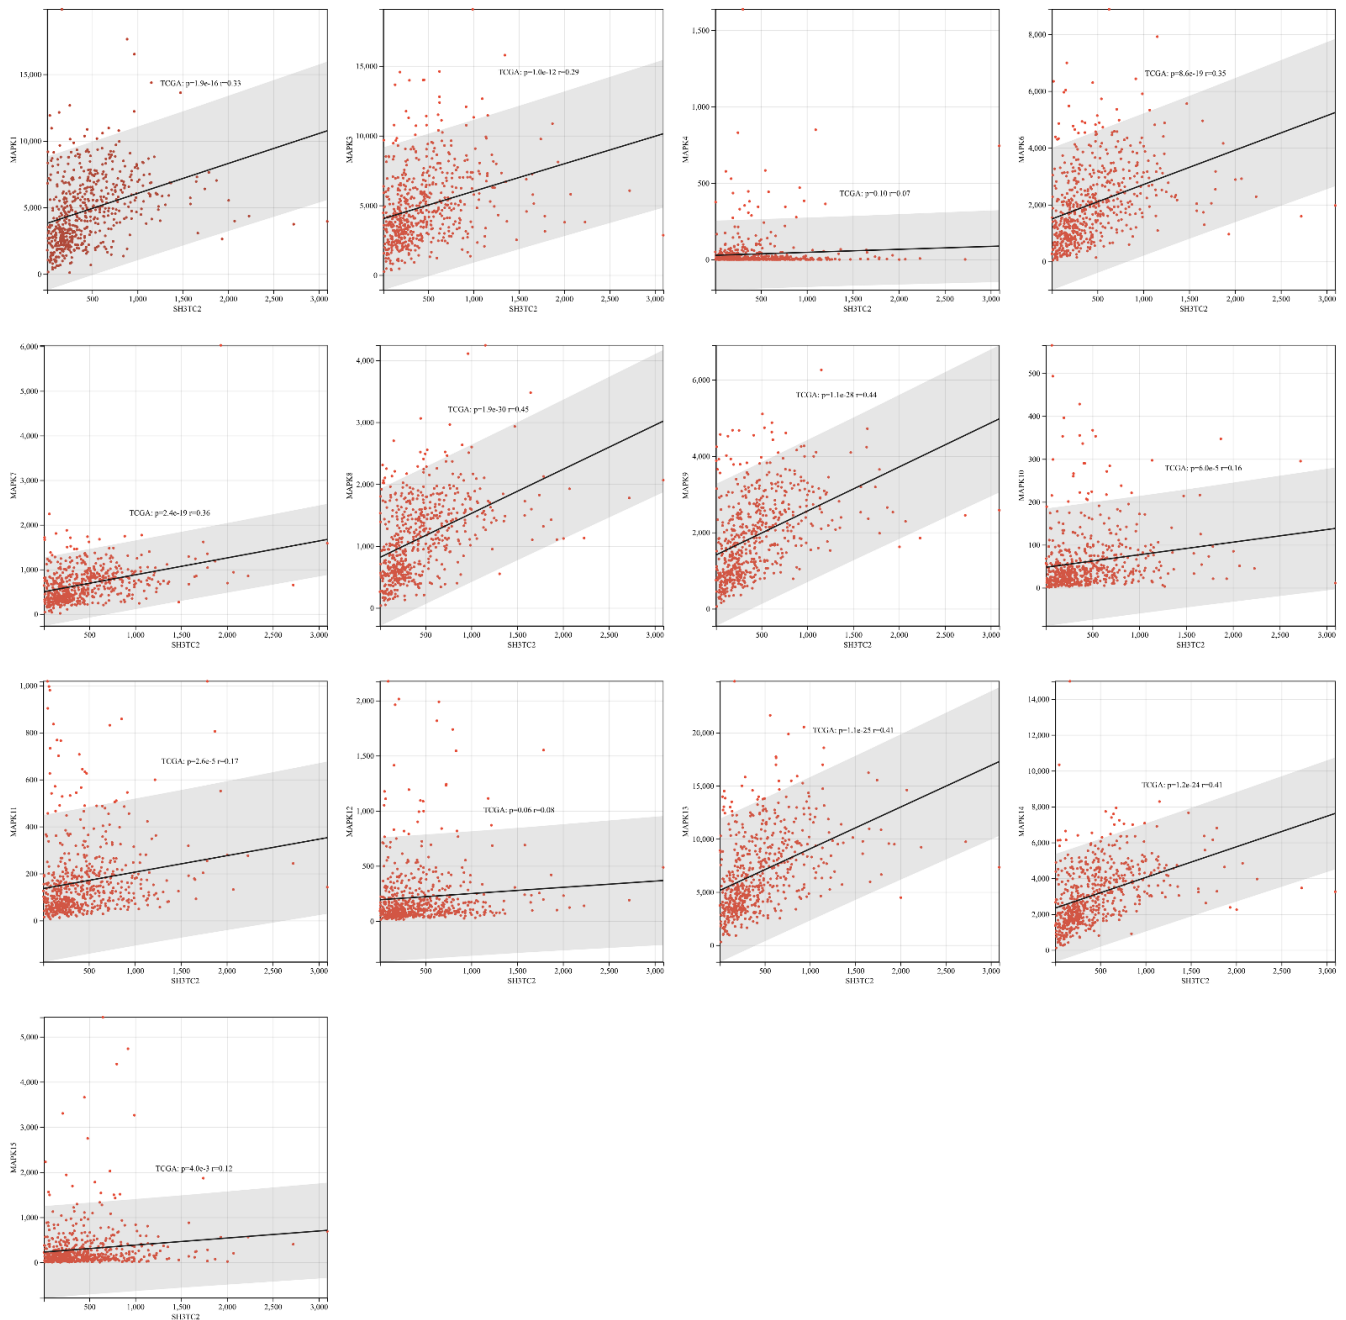

**Figure S4.** The expression relationship between SH3TC2 and MAPKs via bioinformatic analysis in TCGA database.

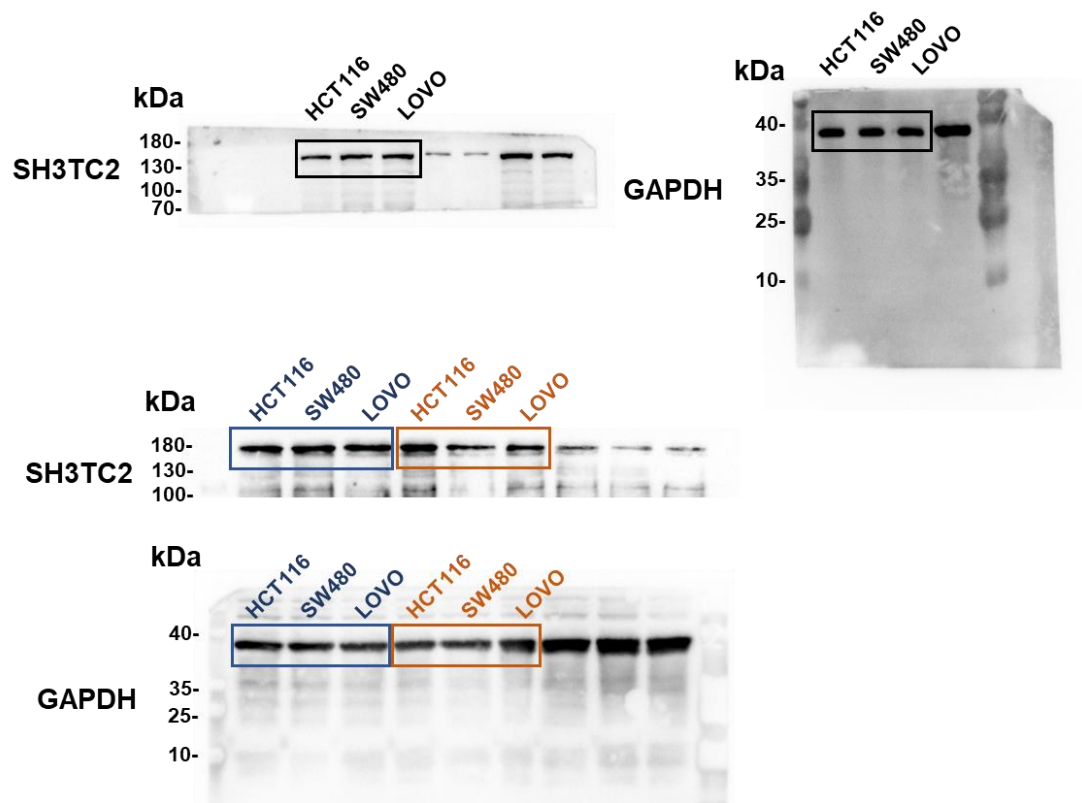

**Figure S5. Source Western-blot Images for Figure 4A.** The black, blue, and orange frame indicates three independent experiments. The quantification analysis for the western-blot could be found in Table S4.

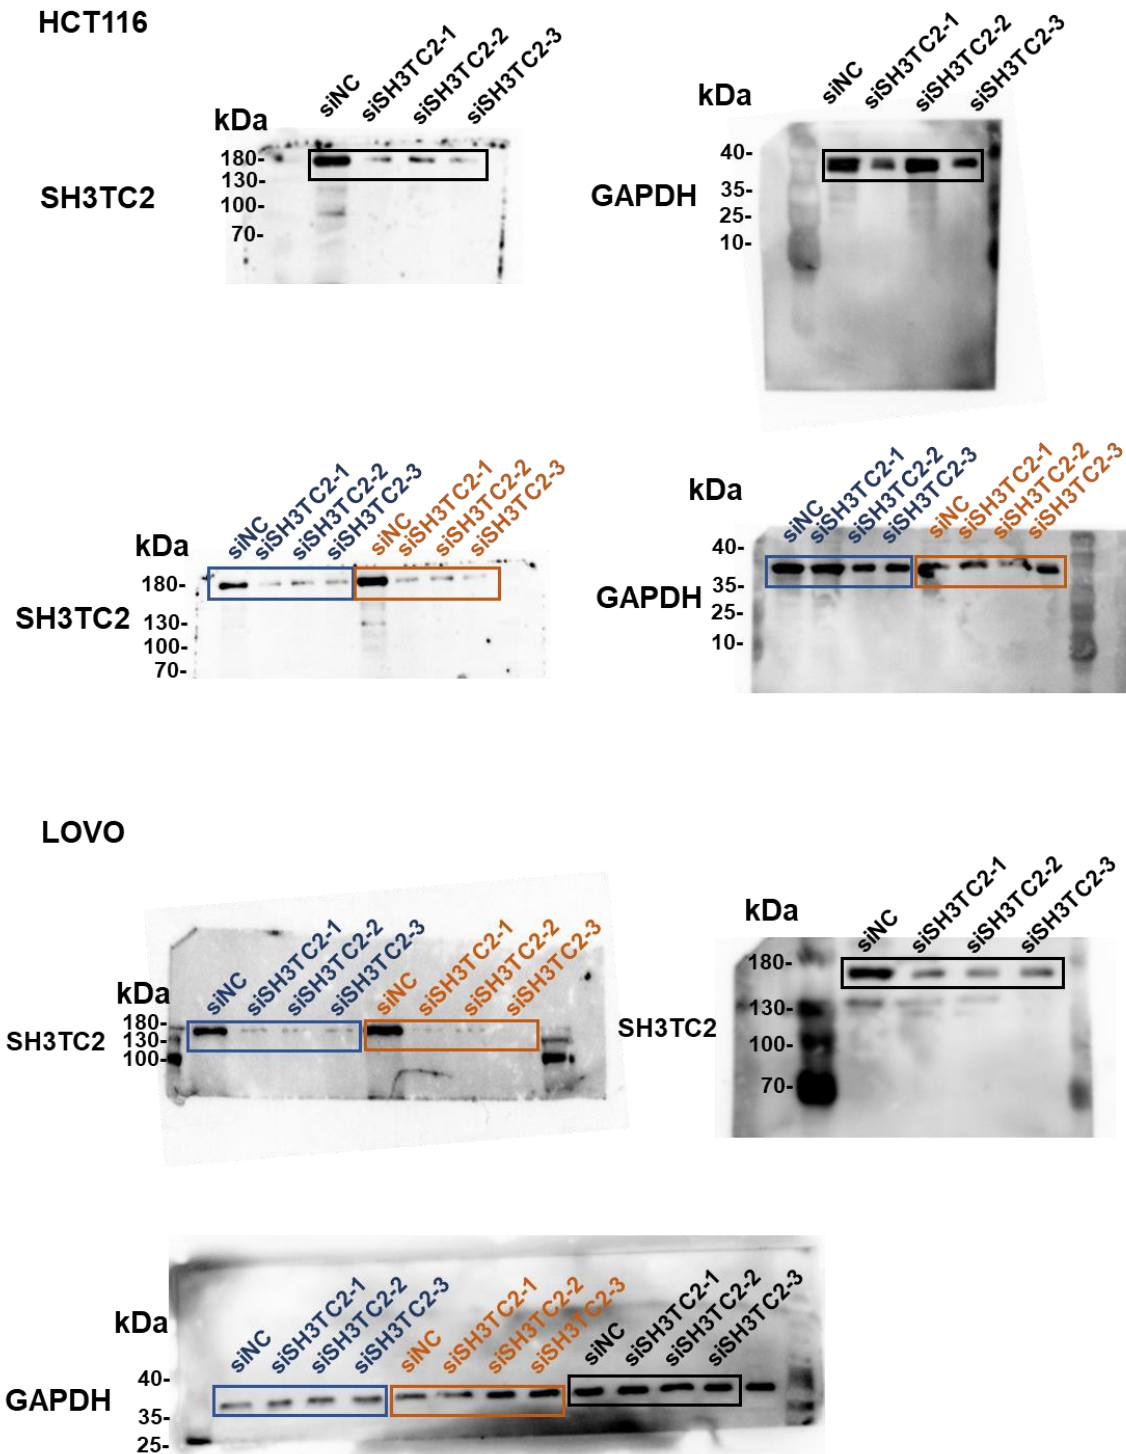

**Figure S6.** Source Western-blot Images for Figure 4C. The black, blue, and orange frame indicates three independent siRNA transfection experiments. The quantification analysis for the western-blot could be found in Table S5.

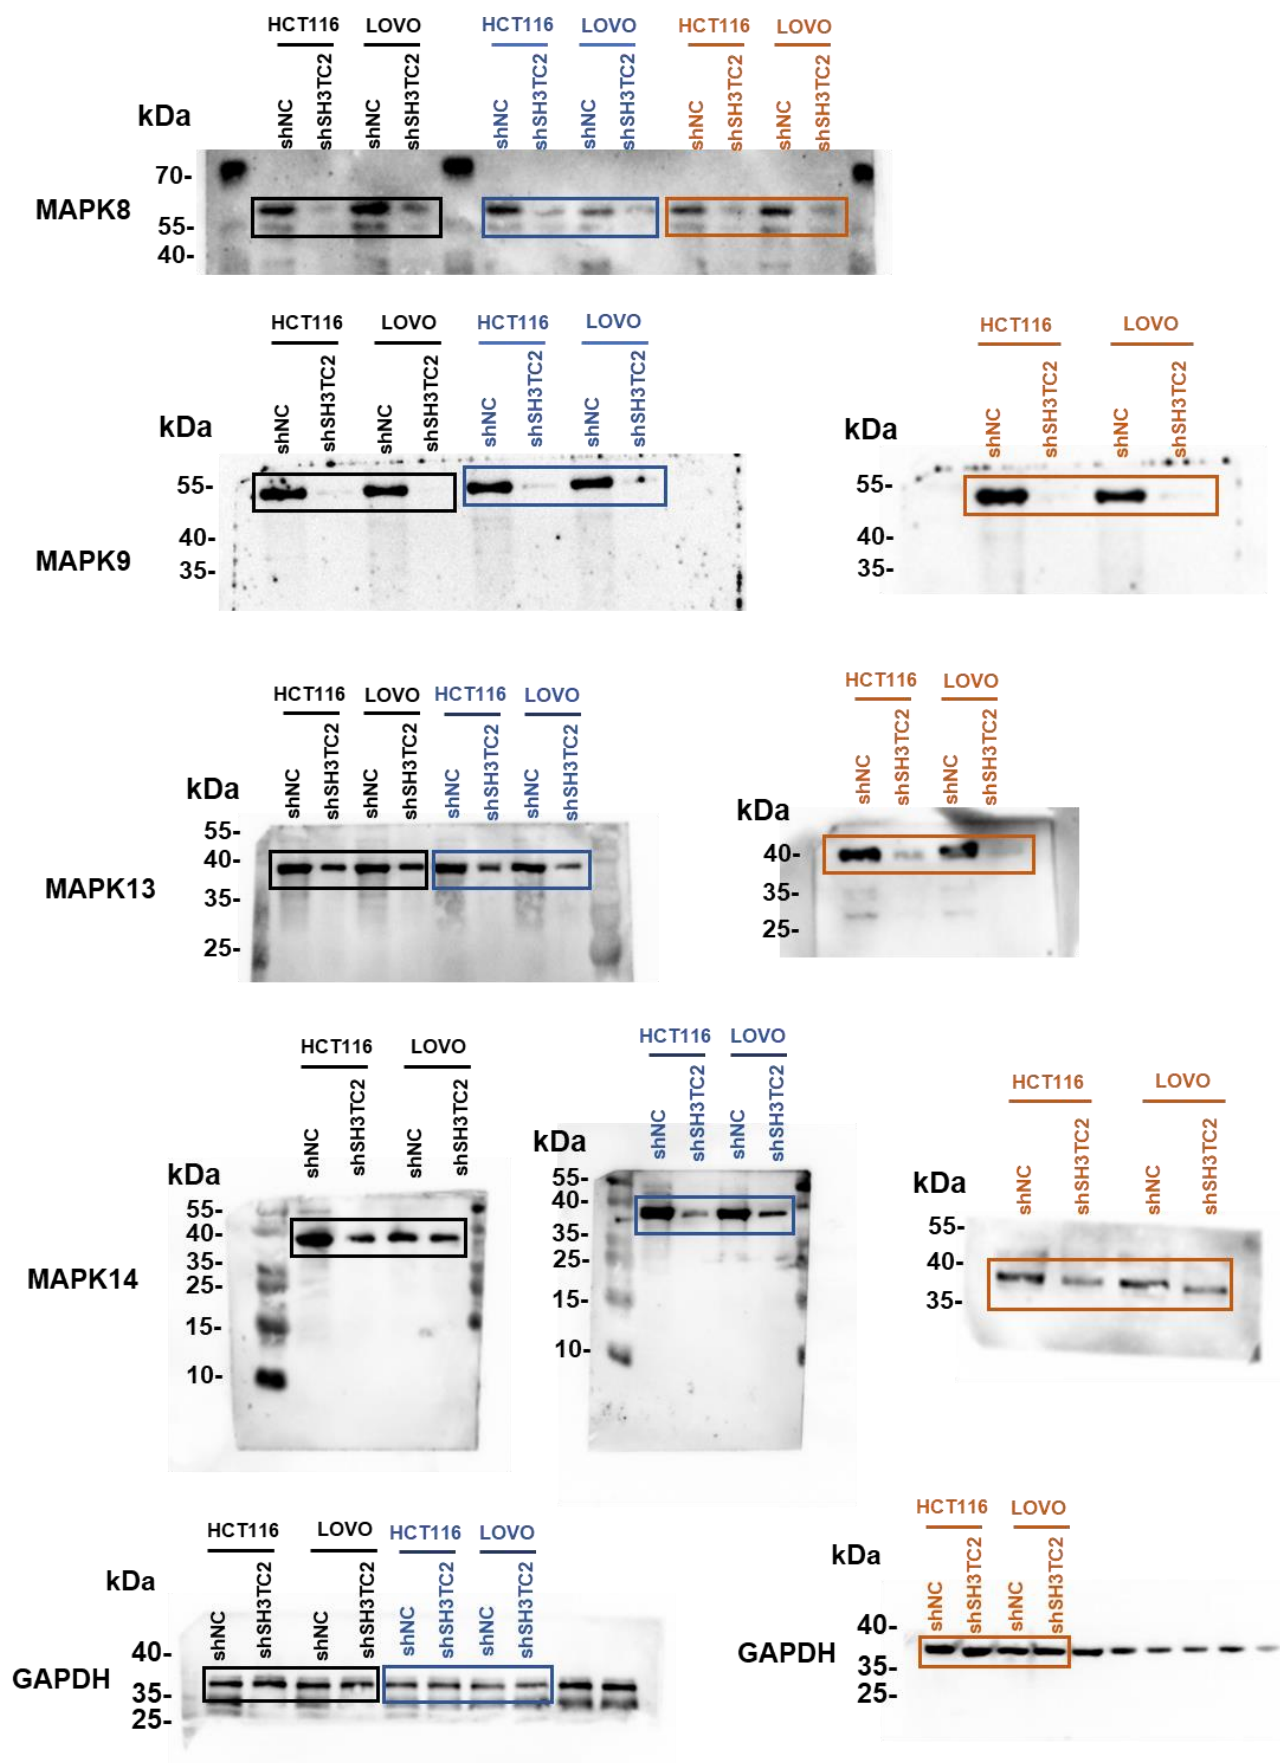

**Figure S7.** Source Western-blot Images for Figure 6A. The black, blue, and orange frame indicates three independent siRNA transfection experiments. The quantification analysis for the western-blot could be found in Table S7.



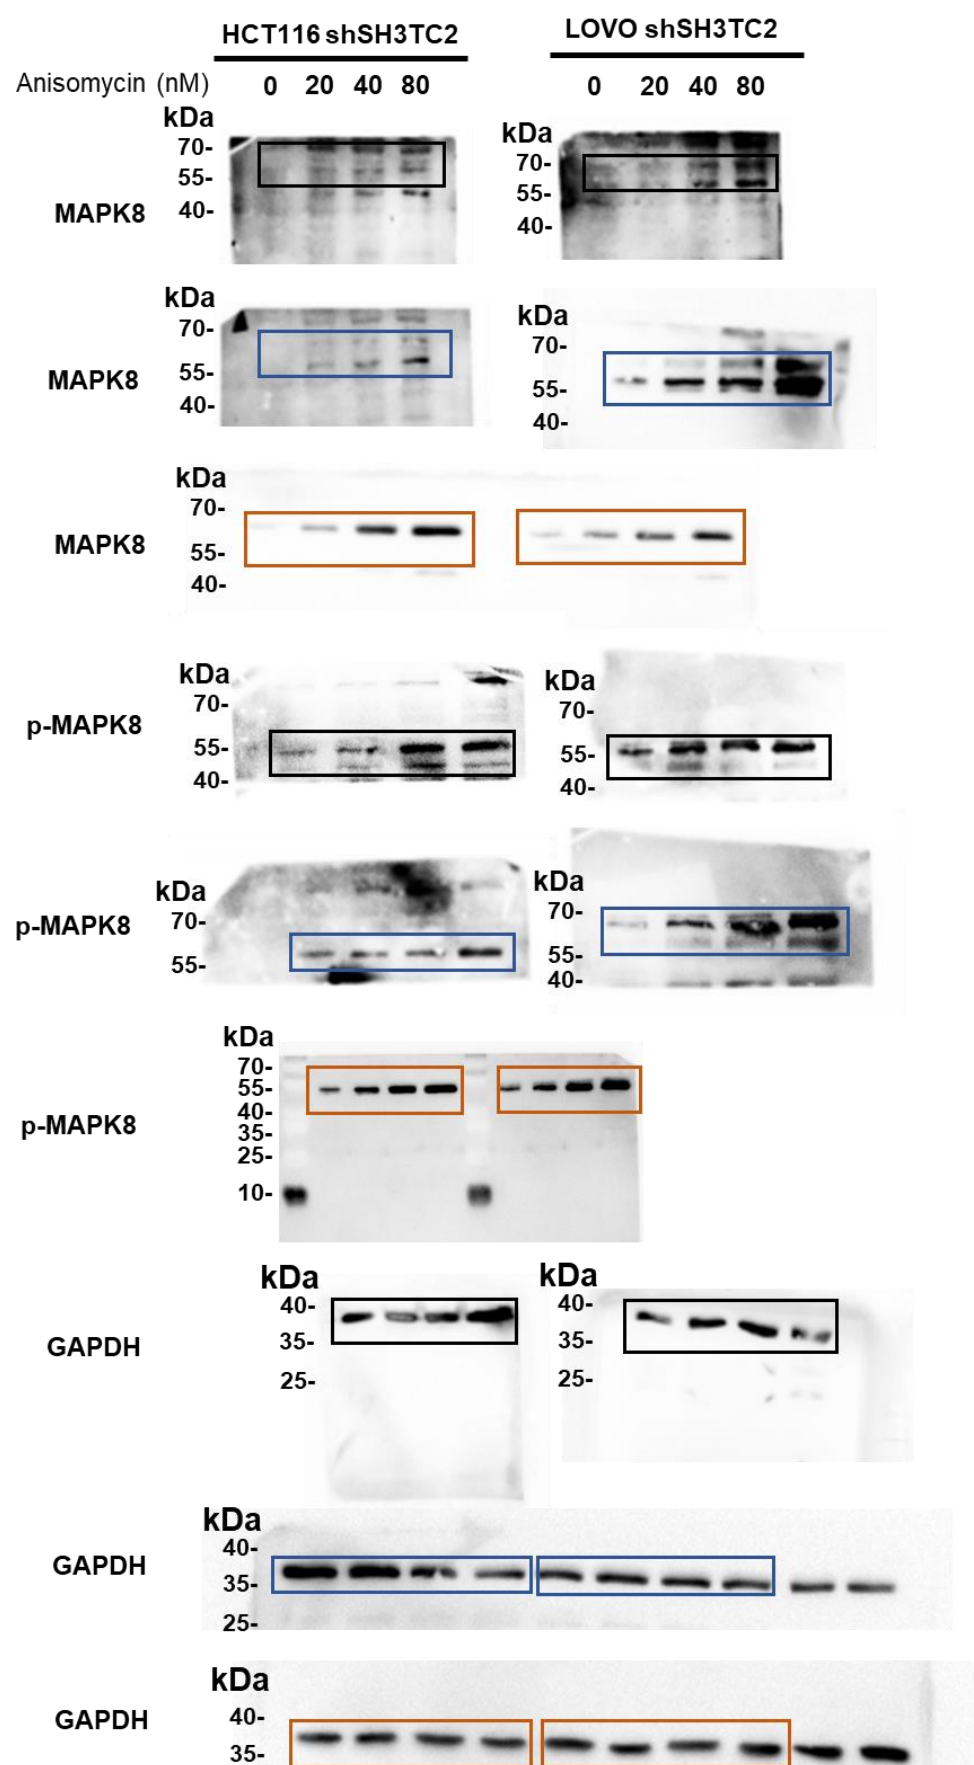

**Figure S8.** Source Western-blot Images for Figure 6C. The black, blue, and orange frame indicates three independent siRNA transfection experiments. The quantification analysis for the western-blot could be found in Table S8.

**Table S1.** Abbreviation of Cancer full Name in TCGA analysis.

| Abbreviation | Full Name                                                        |
|--------------|------------------------------------------------------------------|
| ACC          | Adrenocortical carcinoma                                         |
| BLCA         | Bladder Urothelial Carcinoma                                     |
| BRCA         | Breast invasive carcinoma                                        |
| CESC         | Cervical squamous cell carcinoma and endocervical adenocarcinoma |
| CHOL         | Cholangiocarcinoma                                               |
| COAD         | Colon adenocarcinoma                                             |
| COADREAD     | Colon adenocarcinoma/Rectum adenocarcinoma Esophageal carcinoma  |
| DLBC         | Lymphoid Neoplasm Diffuse Large B-cell Lymphoma                  |
| ESCA         | Esophageal carcinoma                                             |
| FPPP         | FFPE Pilot Phase II                                              |
| GBM          | Glioblastoma multiforme                                          |
| GBMLGG       | Glioma                                                           |
| HNSC         | Head and Neck squamous cell carcinoma                            |
| KICH         | Kidney Chromophobe                                               |
| KIPAN        | Pan-kidney cohort (KICH+KIRC+KIRP)                               |
| KIRC         | Kidney renal clear cell carcinoma                                |
| KIRP         | Kidney renal papillary cell carcinoma                            |
| LAML         | Acute Myeloid Leukemia                                           |
| LGG          | Brain Lower Grade Glioma                                         |
| LIHC         | Liver hepatocellular carcinoma                                   |
| LUAD         | Lung adenocarcinoma                                              |
| LUSC         | Lung squamous cell carcinoma                                     |
| MESO         | Mesothelioma                                                     |
| OV           | Ovarian serous cystadenocarcinoma                                |
| PAAD         | Pancreatic adenocarcinoma                                        |
| PCPG         | Pheochromocytoma and Paraganglioma                               |
| PRAD         | Prostate adenocarcinoma                                          |
| READ         | Rectum adenocarcinoma                                            |
| SARC         | Sarcoma                                                          |
| STAD         | Stomach adenocarcinoma                                           |
| SKCM         | Skin Cutaneous Melanoma                                          |
| STES         | Stomach and Esophageal carcinoma                                 |
| TGCT         | Testicular Germ Cell Tumors                                      |
| THCA         | Thyroid carcinoma                                                |
| THYM         | Thymoma                                                          |
| UCEC         | Uterine Corpus Endometrial Carcinoma                             |
| UCS          | Uterine Carcinosarcoma                                           |
| UVM          | Uveal Melanoma                                                   |

**Table S2.** The list of antibodies used in our study and dilution fold.

| Antigen                                       | Host   | Manufacturer and Cat. No. | Dilution (x-fold) for Western-Blots | Dilution (x-fold) for IHC |
|-----------------------------------------------|--------|---------------------------|-------------------------------------|---------------------------|
| SH3TC2                                        | Rabbit | Bioss ; bs-11221R         | 1000                                | 200                       |
| MAPK8 (JNK)                                   | Mouse  | Proteintech; 66210-1-Ig   | 3000                                | 500                       |
| p-MAPK8 (p-JNK)                               | Rabbit | Proteintech; 80024-1-RR   | 1000                                | Not available             |
| MAPK9                                         | Rabbit | Sangon Biotech; D260527   | 1000                                | 200                       |
| MAPK13                                        | Rabbit | Sangon Biotech; D160920   | 1000                                | 200                       |
| MAPK14                                        | Mouse  | Proteintech; 66234-1-Ig   | 1000                                | 200                       |
| GAPDH                                         | Rabbit | Bioworld; AP0066          | 5000                                | Not available             |
| HRP-conjugated anti-rabbit secondary antibody | Goat   | Bioworld; BS13278         | 5000                                | Not available             |
| HRP-conjugated anti-mouse secondary antibody  | Goat   | Proteintech; SA00001-1    | 5000                                | Not available             |



**Table S3.** SH3TC2 siRNA sequences.

| Name       |           | SH3TC2 RNA Oligo Sequences (5' - 3') |
|------------|-----------|--------------------------------------|
| siSH3TC2-1 | Guide     | UUCUUCUUGUGAAAUGAGGGG                |
|            | Passenger | CCUCAUUUCACAAGAAGAAGA                |
| siSH3TC2-2 | Guide     | UUUUCAGAGGCUGUUUGUGUG                |
|            | Passenger | CACAAACAGCCUCUGAAAAGC                |
| siSH3TC2-3 | Guide     | UUAUGUAUGGAGAAAGUGCUU                |
|            | Passenger | GCACUUUCUCCAUAACAUAUU                |

**Table S4.** Primers used in qRT-PCR analysis.

| Target |         | Primer Sequences (5' - 3') |
|--------|---------|----------------------------|
| SH3TC2 | Forward | CTGTAAGGCCTTGACGGGTT       |
|        | Reverse | GAGTTCCTGCTCATTGGGGA       |
| MAPK1  | Forward | CAGTTCTTGACCCCTGGTCC       |
|        | Reverse | TACATACTGCCGCAGGTCAC       |
| MAPK3  | Forward | GCCAAGCTTTTCCCAAGTC        |
|        | Reverse | CAGCCGCTCCTTAGGTAGGT       |
| MAPK4  | Forward | GCTCTGCCTCGGGAAGGA         |
|        | Reverse | GCATCCAGGGGCTTCTTTCT       |
| MAPK6  | Forward | CGTGGAGTCTCGCCTTACTG       |
|        | Reverse | ACTTCAGGGCTCTGAGACGA       |
| MAPK7  | Forward | CAAGAACCTGGCCCTGCTTA       |
|        | Reverse | CAGGACCACGTAGACAGATTGA     |
| MAPK8  | Forward | CTGAAGCAGAAGCTCCACCA       |
|        | Reverse | GCCATTGATCACTGCTGCAC       |
| MAPK9  | Forward | AGTCATCCTGGGTATGGGCT       |
|        | Reverse | GGAAGGATACGGTCAGTGCC       |
| MAPK10 | Forward | AGAGGGTGATTGAGCAAGCC       |
|        | Reverse | TTTGCCCCAGAAATCCTCCC       |
| MAPK11 | Forward | GAACAAGACCGTGTGGGAGG       |
|        | Reverse | GGAATTGAACGTGCTCGTCG       |
| MAPK12 | Forward | GGCTGAGGTATATCCACGCTG      |
|        | Reverse | AACAGCGTCTTGCCTGTGAT       |
| MAPK13 | Forward | CCCTCTGTGGGCAGCATTTA       |
|        | Reverse | CAGCTCAAAGGTACAGCCCA       |
| MAPK14 | Forward | GCATAATGGCCGAGCTGTTG       |
|        | Reverse | TCATGGCTTGGCATCCTGTT       |
| MAPK15 | Forward | AGATACCTACTCAGGCGGCA       |
|        | Reverse | GATGGTCCCCAACTCCTGG        |
| GAPDH  | Forward | TCAACGGATTTGGTCGTATTGGGCG  |
|        | Reverse | CTCGCTCCTGGAAGATGGTGATGGG  |

**Table S5.** The SH3TC2 expression and the clinical characteristic of CRC patients.

| Group                          | n  | SH3TC2 Protein Expression in IHC analysis |                 |            |        |
|--------------------------------|----|-------------------------------------------|-----------------|------------|--------|
|                                |    | Low expression                            | High Expression | Chi-square | P      |
| Total                          | 40 | 20                                        | 20              |            |        |
| <b>Gender</b>                  |    |                                           |                 |            |        |
| Female                         | 28 | 15                                        | 13              | 0.4762     | 0.490  |
| Male                           | 12 | 5                                         | 7               |            |        |
| <b>Age</b>                     |    |                                           |                 |            |        |
| ≤60                            | 9  | 4                                         | 5               | 0.1434     | 0.705  |
| >60                            | 31 | 16                                        | 15              |            |        |
| <b>Tumor Location</b>          |    |                                           |                 |            |        |
| Colon                          | 24 | 13                                        | 11              | 0.4167     | 0.519  |
| Rectum                         | 16 | 7                                         | 9               |            |        |
| <b>Tumor Stage (TNM Stage)</b> |    |                                           |                 |            |        |
| I + II                         | 17 | 14                                        | 3               | 12.3785    | <0.001 |
| III + IV                       | 23 | 6                                         | 17              |            |        |
| <b>Tumor Differentiation</b>   |    |                                           |                 |            |        |
| Median or Well                 | 31 | 16                                        | 15              | 0.1434     | 0.705  |
| Poor                           | 9  | 4                                         | 5               |            |        |

**Table S6.** Source data for Figure 4A.

| Target | Sample | Relative Grey Density 1 | Relative Grey Density 2 | Relative Grey Density 3 | Relative Expression 1 | Relative Expression 2 | Relative Expression 3 |
|--------|--------|-------------------------|-------------------------|-------------------------|-----------------------|-----------------------|-----------------------|
| SH3TC2 | HCT116 | 44850                   | 106975                  | 89042                   | 0.85                  | 0.87                  | 1.09                  |
|        | SW480  | 47906                   | 107437                  | 88259                   | 0.86                  | 1.00                  | 0.88                  |
|        | LOVO   | 51333                   | 100246                  | 75782                   | 0.97                  | 1.08                  | 0.64                  |
| GAPDH  | HCT116 | 52967                   | 123107                  | 81748                   |                       |                       |                       |
|        | SW480  | 55474                   | 106952                  | 99760                   |                       |                       |                       |
|        | LOVO   | 52701                   | 92790                   | 117603                  |                       |                       |                       |

**Table S7.** Source data for Figure 4C.

| Cell Line | Target | Sample     | Relative Grey Density 1 | Relative Grey Density 2 | Relative Grey Density 3 | Relative Expression 1 | Relative Expression 2 | Relative Expression 3 |
|-----------|--------|------------|-------------------------|-------------------------|-------------------------|-----------------------|-----------------------|-----------------------|
| HCT116    | SH3TC2 | siNC       | 90866                   | 101831                  | 65023                   | 0.84                  | 0.97                  | 1.06                  |
|           |        | siSH3TC2-1 | 10114                   | 10005                   | 9764                    | 0.20                  | 0.10                  | 0.24                  |
|           |        | siSH3TC2-2 | 10906                   | 11141                   | 10147                   | 0.12                  | 0.20                  | 0.23                  |
|           |        | siSH3TC2-3 | 9728                    | 11507                   | 5386                    | 0.18                  | 0.20                  | 0.12                  |
|           | GAPDH  | siNC       | 108031                  | 104683                  | 61210                   |                       |                       |                       |
|           |        | siSH3TC2-1 | 49561                   | 97063                   | 40406                   |                       |                       |                       |
|           |        | siSH3TC2-2 | 91892                   | 55013                   | 43335                   |                       |                       |                       |
|           |        | siSH3TC2-3 | 55281                   | 57489                   | 44271                   |                       |                       |                       |
| LOVO      | SH3TC2 | siNC       | 75030                   | 85550                   | 83401                   | 1.05                  | 0.94                  | 0.98                  |
|           |        | siSH3TC2-1 | 18097                   | 11390                   | 11615                   | 0.23                  | 0.13                  | 0.14                  |
|           |        | siSH3TC2-2 | 10927                   | 16166                   | 17132                   | 0.15                  | 0.17                  | 0.21                  |
|           |        | siSH3TC2-3 | 16786                   | 14159                   | 10337                   | 0.22                  | 0.15                  | 0.12                  |
|           | GAPDH  | siNC       | 71661                   | 91010                   | 84905                   |                       |                       |                       |
|           |        | siSH3TC2-1 | 78413                   | 90188                   | 82675                   |                       |                       |                       |
|           |        | siSH3TC2-2 | 71687                   | 93372                   | 82536                   |                       |                       |                       |
|           |        | siSH3TC2-3 | 75353                   | 94171                   | 85157                   |                       |                       |                       |

**Table S8.** Source data for Figure 6A.

| <b>Target</b> | <b>Sample</b>   | <b>Relative<br/>Grey Density<br/>1</b> | <b>Relative<br/>Grey Density<br/>2</b> | <b>Relative<br/>Grey Density<br/>3</b> | <b>Relative Ex-<br/>pression 1</b> | <b>Relative Ex-<br/>pression 2</b> | <b>Relative Ex-<br/>pression 3</b> |
|---------------|-----------------|----------------------------------------|----------------------------------------|----------------------------------------|------------------------------------|------------------------------------|------------------------------------|
| MAPK8         | HCT116 shNC     | 76768                                  | 65188                                  | 65862                                  | 1.2818167                          | 1.1976484                          | 1.1128157                          |
|               | HCT116 shSH3TC2 | 8808                                   | 8460                                   | 8479                                   | 0.1048846                          | 0.1429972                          | 0.1484523                          |
|               | LOVO shNC       | 79753                                  | 51060                                  | 52006                                  | 1.2351019                          | 1.0096097                          | 1.0010972                          |
|               | LOVO shSH3TC2   | 13664                                  | 7599                                   | 9960                                   | 0.1854632                          | 0.1882525                          | 0.1719346                          |
| MAPK9         | HCT116 shNC     | 100553                                 | 140590                                 | 134955                                 | 1.6789614                          | 1.7494369                          | 1.3969485                          |
|               | HCT116 shSH3TC2 | 9675                                   | 9388                                   | 3521                                   | 0.1152087                          | 0.214245                           | 0.151931                           |
|               | LOVO shNC       | 109562                                 | 152143                                 | 122086                                 | 1.6967416                          | 1.7806165                          | 1.5366587                          |
|               | LOVO shSH3TC2   | 9599                                   | 5905                                   | 7511                                   | 0.1302884                          | 0.1852956                          | 0.196824                           |
| MAPK13        | HCT116 shNC     | 91866                                  | 80363                                  | 96607                                  | 1.5339122                          | 1.4764468                          | 1.6322886                          |
|               | HCT116 shSH3TC2 | 54455                                  | 43819                                  | 23175                                  | 0.6484436                          | 0.7406612                          | 0.4057532                          |
|               | LOVO shNC       | 83991                                  | 85444                                  | 79449                                  | 1.3007341                          | 1.6894847                          | 1.5293653                          |
|               | LOVO shSH3TC2   | 47110                                  | 31868                                  | 38161                                  | 0.6394299                          | 0.7894763                          | 0.6587547                          |
| MAPK14        | HCT116 shNC     | 107868                                 | 100122                                 | 96848                                  | 1.801102                           | 1.8394635                          | 1.6363606                          |
|               | HCT116 shSH3TC2 | 62547                                  | 39236                                  | 47685                                  | 0.7448022                          | 0.663196                           | 0.8348799                          |
|               | LOVO shNC       | 109278                                 | 79363                                  | 95752                                  | 1.6923434                          | 1.5692451                          | 1.8431924                          |
|               | LOVO shSH3TC2   | 68457                                  | 51629                                  | 52140                                  | 0.9291754                          | 1.2790219                          | 0.9000673                          |
| GAPDH         | HCT116 shNC     | 59890                                  | 54430                                  | 59185                                  |                                    |                                    |                                    |
|               | HCT116 shSH3TC2 | 83978                                  | 59162                                  | 57116                                  |                                    |                                    |                                    |
|               | LOVO shNC       | 64572                                  | 50574                                  | 51949                                  |                                    |                                    |                                    |
|               | LOVO shSH3TC2   | 73675                                  | 40366                                  | 57929                                  |                                    |                                    |                                    |

**Table S9.** Source data for Figure 6C.

| Cell Line          | Target  | Anisomycin<br>Concentration<br>(nM) | Relative<br>Grey Den-<br>sity 1 | Relative<br>Grey Den-<br>sity 2 | Relative<br>Grey Den-<br>sity 3 | Relative Ex-<br>pression 1 | Relative Ex-<br>pression 2 | Relative Ex-<br>pression 3 |
|--------------------|---------|-------------------------------------|---------------------------------|---------------------------------|---------------------------------|----------------------------|----------------------------|----------------------------|
| HCT116<br>shSH3TC2 | MAPK8   | 0                                   | 16098                           | 12033                           | 13994                           | 0.171372                   | 0.1139672                  | 0.1338178                  |
|                    |         | 20                                  | 31403                           | 29517                           | 29802                           | 0.3220556                  | 0.286634                   | 0.2804182                  |
|                    |         | 40                                  | 64922                           | 66266                           | 64790                           | 0.6878423                  | 0.6455214                  | 0.5969008                  |
|                    |         | 80                                  | 94336                           | 91230                           | 96450                           | 0.9540743                  | 0.9108245                  | 0.9644228                  |
| HCT116<br>shSH3TC2 | p-MAPK8 | 0                                   | 14638                           | 19831                           | 46211                           | 0.1558295                  | 0.1878238                  | 0.4418934                  |
|                    |         | 20                                  | 43348                           | 43911                           | 41988                           | 0.4445584                  | 0.4264115                  | 0.3950808                  |
|                    |         | 40                                  | 84160                           | 81418                           | 89478                           | 0.8916671                  | 0.7931226                  | 0.8243477                  |
|                    |         | 80                                  | 118863                          | 112671                          | 104699                          | 1.2021299                  | 1.1248877                  | 1.0469062                  |
| HCT116<br>shSH3TC2 | GAPDH   | 0                                   | 93936                           | 105583                          | 104575                          |                            |                            |                            |
|                    |         | 20                                  | 97508                           | 102978                          | 106277                          |                            |                            |                            |
|                    |         | 40                                  | 94385                           | 102655                          | 108544                          |                            |                            |                            |
|                    |         | 80                                  | 98877                           | 100162                          | 100008                          |                            |                            |                            |
| LOVO<br>shSH3TC2   | MAPK8   | 0                                   | 10553                           | 11848                           | 10679                           | 0.1038927                  | 0.1048319                  | 0.1012535                  |
|                    |         | 20                                  | 35675                           | 35195                           | 32024                           | 0.3485589                  | 0.3174983                  | 0.3111112                  |
|                    |         | 40                                  | 79562                           | 102312                          | 98788                           | 0.7608055                  | 0.8969229                  | 0.9006519                  |
|                    |         | 80                                  | 95990                           | 109606                          | 110146                          | 0.9497284                  | 1.0705593                  | 1.0419737                  |
| LOVO<br>shSH3TC2   | p-MAPK8 | 0                                   | 11365                           | 11670                           | 15804                           | 0.1118867                  | 0.103257                   | 0.1498464                  |
|                    |         | 20                                  | 57762                           | 56539                           | 53065                           | 0.5643576                  | 0.510045                   | 0.5155245                  |
|                    |         | 40                                  | 105479                          | 106605                          | 101824                          | 1.0086349                  | 0.9345577                  | 0.9283311                  |
|                    |         | 80                                  | 135198                          | 135755                          | 130730                          | 1.3376537                  | 1.3259655                  | 1.236697                   |
| LOVO<br>shSH3TC2   | GAPDH   | 0                                   | 101576                          | 113019                          | 105468                          |                            |                            |                            |
|                    |         | 20                                  | 102350                          | 110851                          | 102934                          |                            |                            |                            |
|                    |         | 40                                  | 104576                          | 114070                          | 109685                          |                            |                            |                            |
|                    |         | 80                                  | 101071                          | 102382                          | 105709                          |                            |                            |                            |
